# Supplementary material for: Metal–ligand complexation and clustering in mussel-inspired side-chain functionalized supramolecular hydrogels
Source: Royal Society of Chemistry journal article supplement (doi:10.1039/d2sm00666a), 2022-01-01
Supplement: d2sm00666a1.pdf [file d2sm00666a1.pdf]

## Supporting Information

### Metal–ligand complexation and clustering in mussel-inspired side-chain functionalized supramolecular hydrogels

Amir Jangizehi<sup>a</sup>, Mostafa Ahmadi<sup>a</sup>, Sarah Pschierer<sup>a</sup>, Paola Nicoletta<sup>a</sup>, Hailong Li<sup>b</sup>, Katrin Amann-  
Winkel<sup>b</sup>, and Sebastian Seiffert<sup>a\*</sup>

<sup>a</sup> Johannes Gutenberg University Mainz, Department of Chemistry, Duesberweg 10–14, D-55128  
Mainz, Germany

<sup>b</sup> Max Planck Institute for Polymer Research, D-55128 Mainz, Germany

Email: Sebastian.seiffert@uni-mainz.de

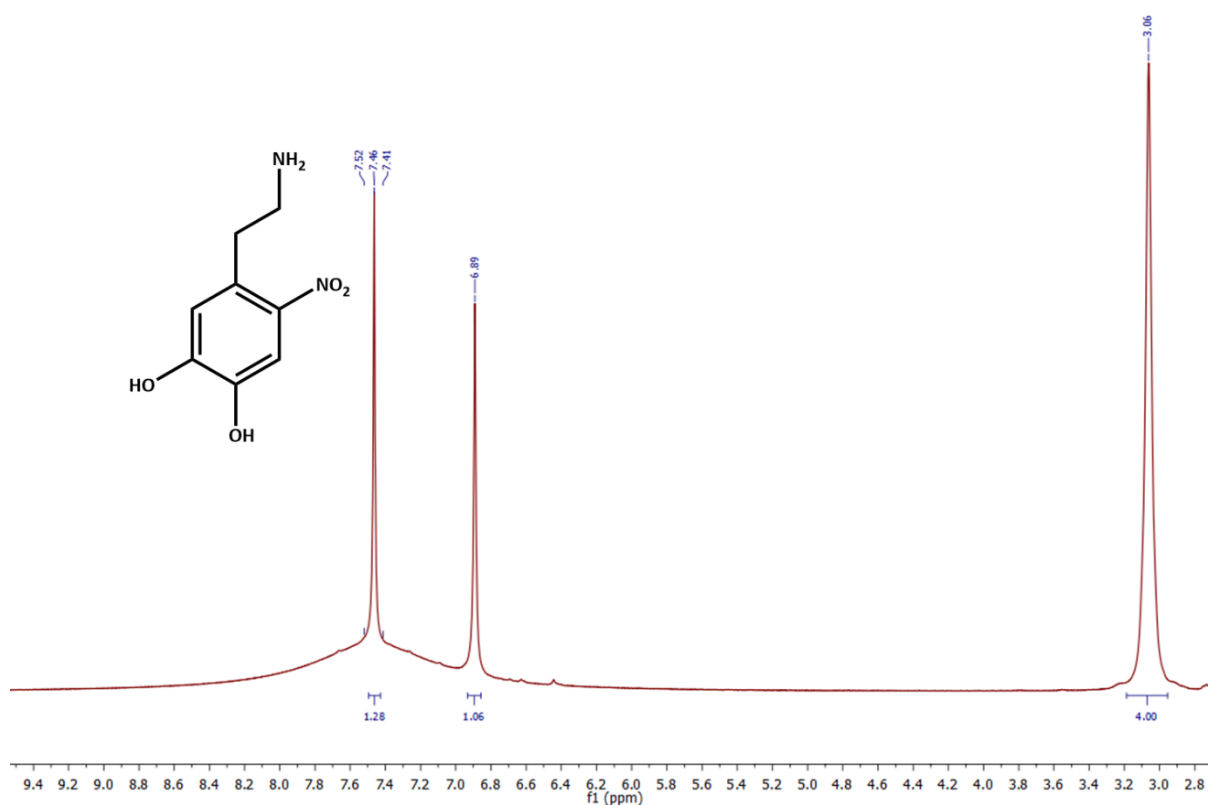

Figure S 1. <sup>1</sup>H NMR spectrum of nitrodopamine hydrogen sulfate

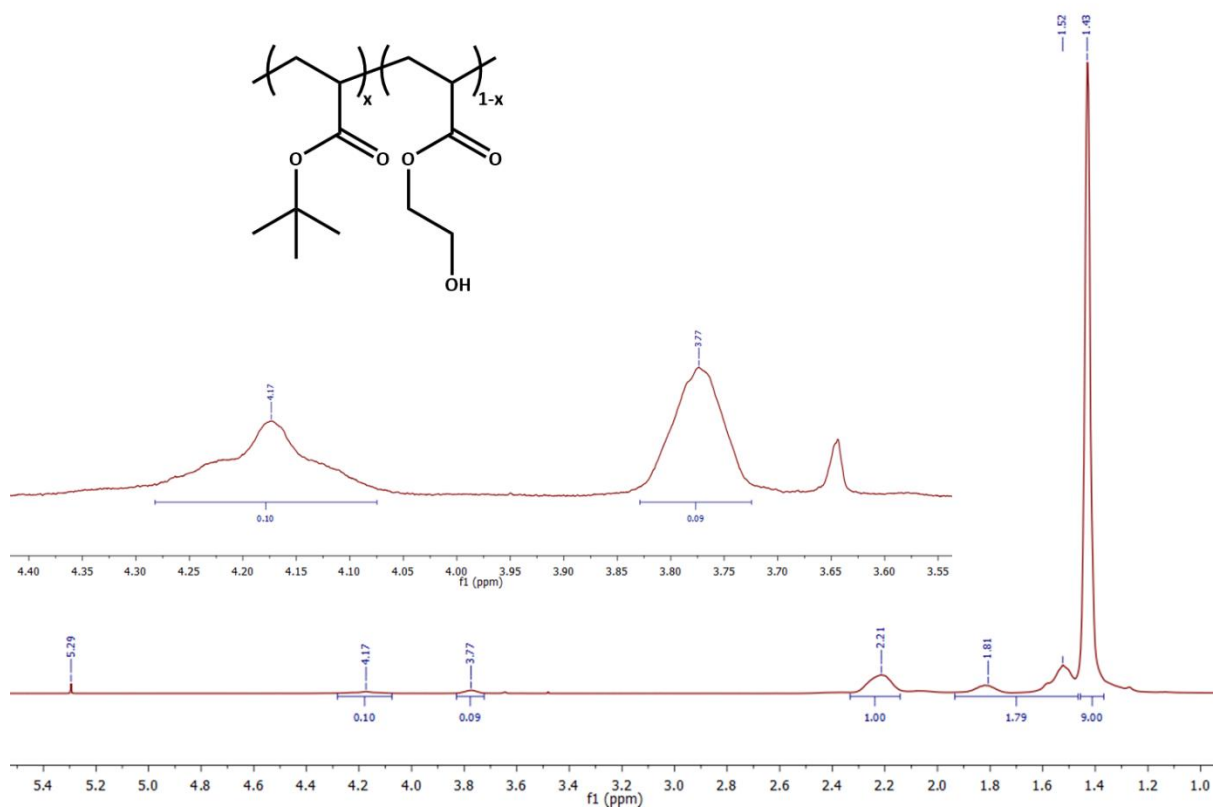

Figure S 2. <sup>1</sup>H NMR spectrum of poly(*tert*-butyl acrylate-*ran*-hydroxyethyl acrylate)

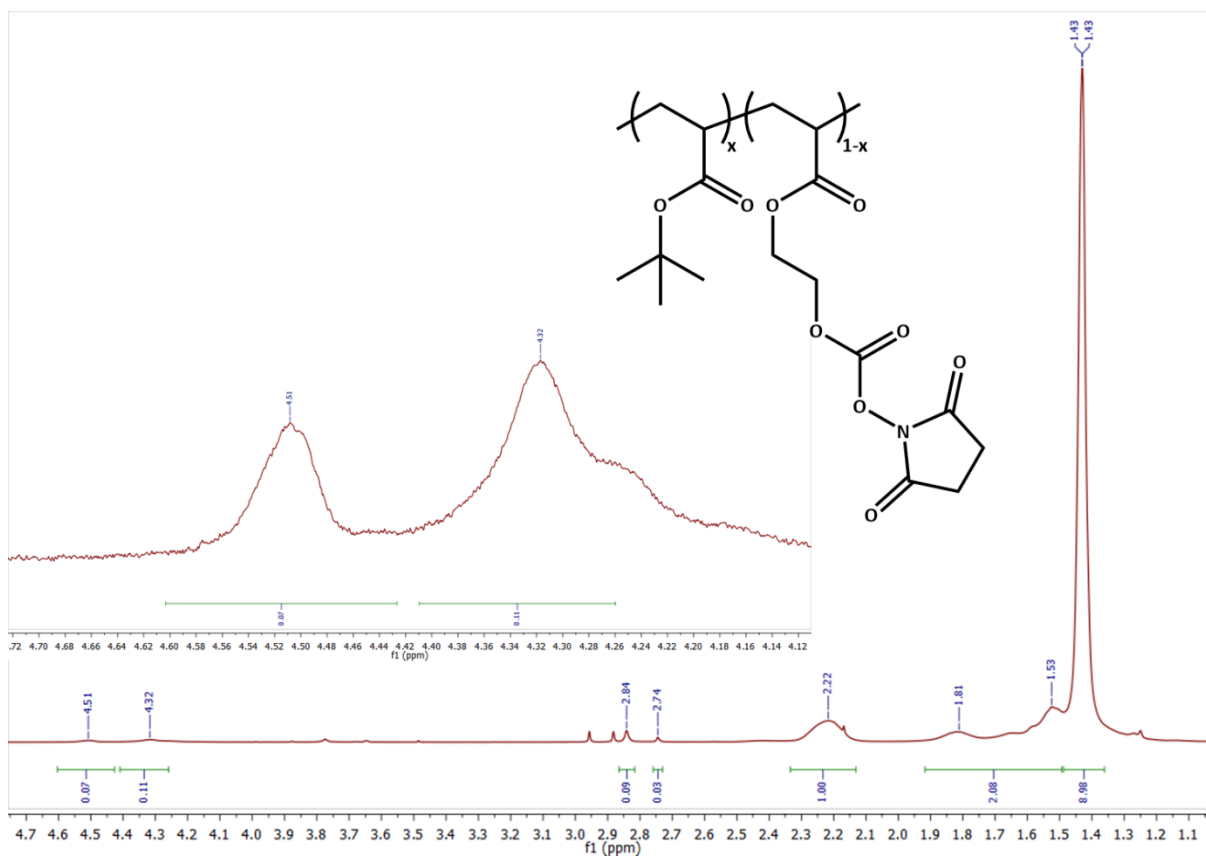

Figure S 3.  $^1\text{H}$  NMR spectrum of poly(*tert*-butyl acrylate-*ran*-NHS-ethyl acrylate)

+

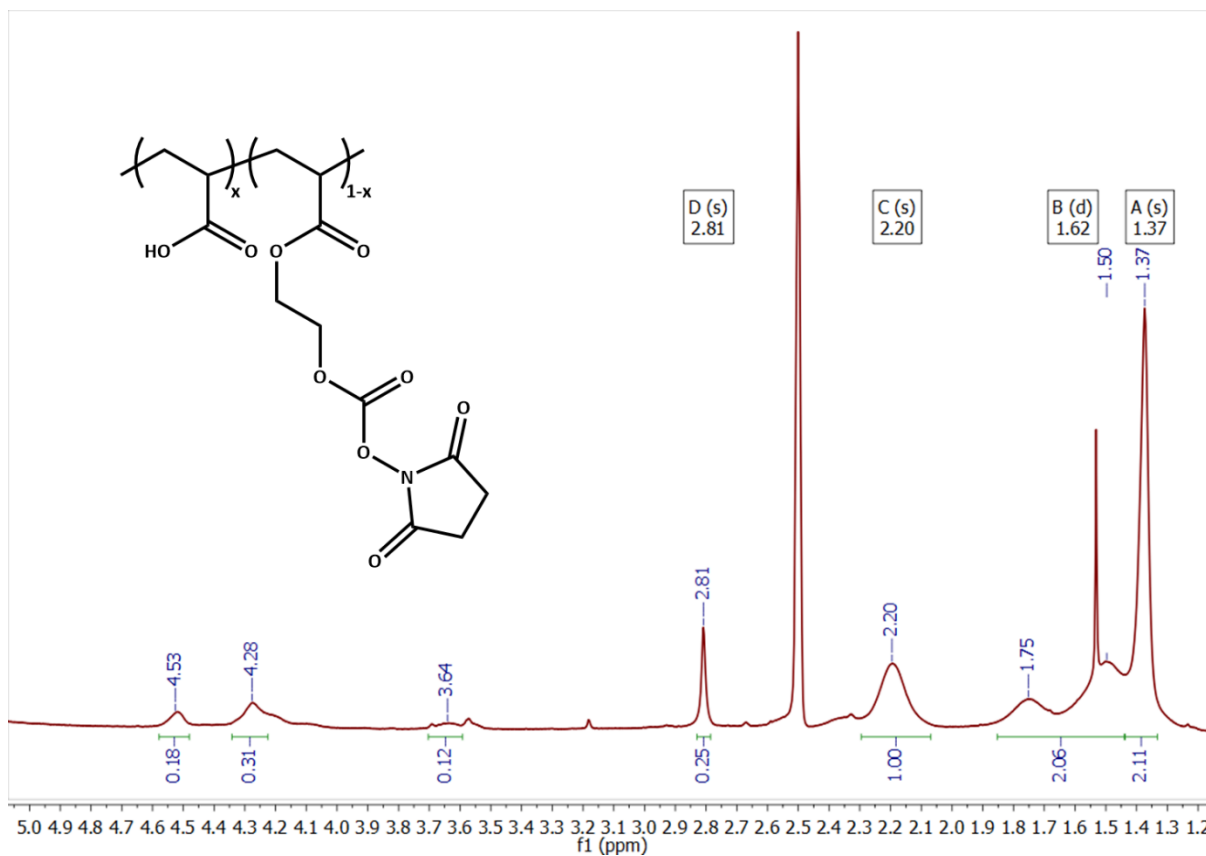

Figure S 4.  $^1\text{H}$  NMR spectrum of poly(AAc-*ran*-NHS-ethyl acrylate)

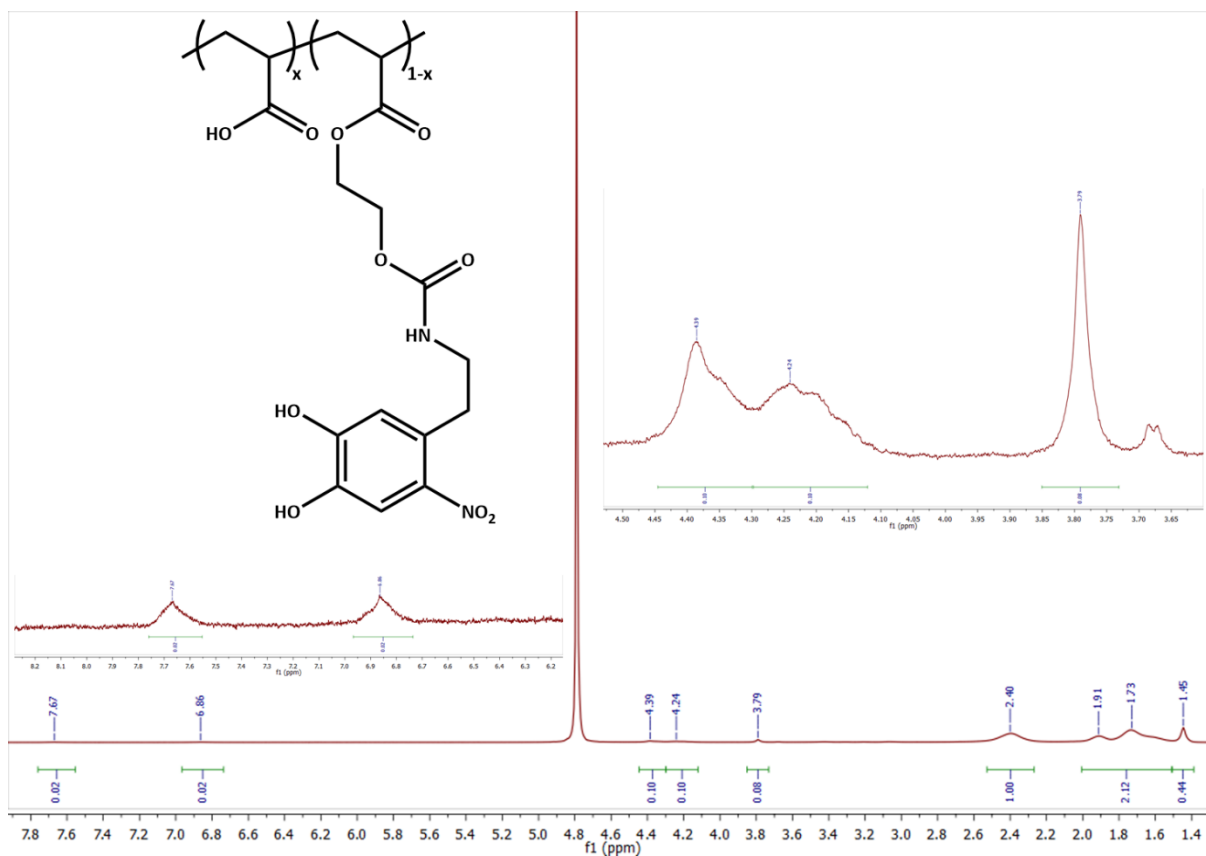

Figure S 5.  $^1\text{H NMR}$  spectrum of Poly(acrylic acid-*ran*-NHS-ethyl acrylate)

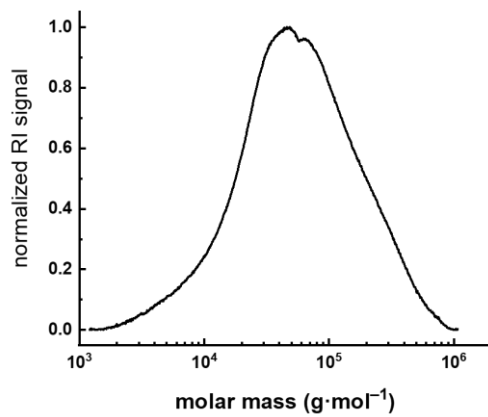

Figure S 6. GPC spectrum of poly(*tert*-butyl acrylate-*ran*-hydroxyethyl acrylate). The polydispersity index ( $M_w/M_n$ ) is 3.16.

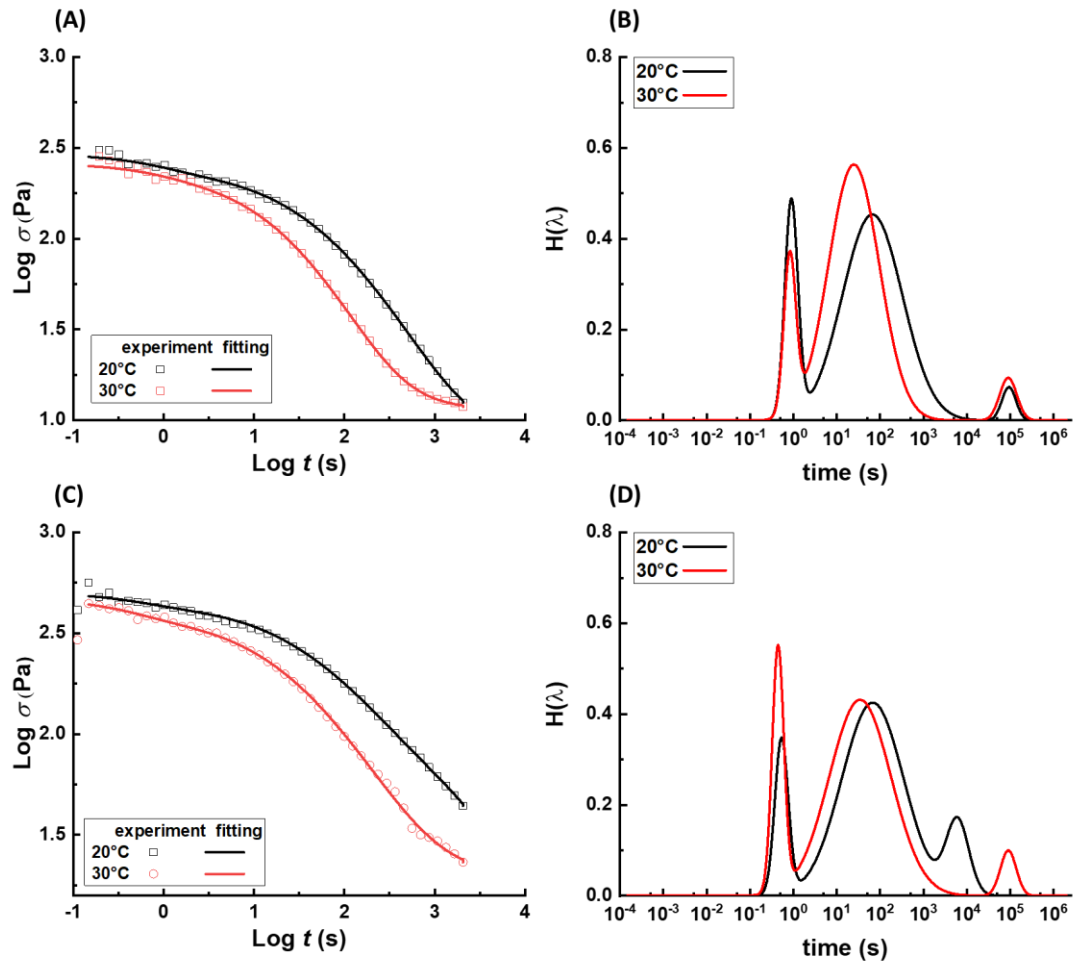

Figure S 7. (A) Comparison of the experimentally and calculated stress relaxation data for sample 153 at 20°C and 30°C. (B) The relaxation time spectrum for this sample at 20°C and 30°C, obtained from the fitting of stress relaxation data by considering three relaxation modes. (C) and (D) demonstrate similar data for sample 203.

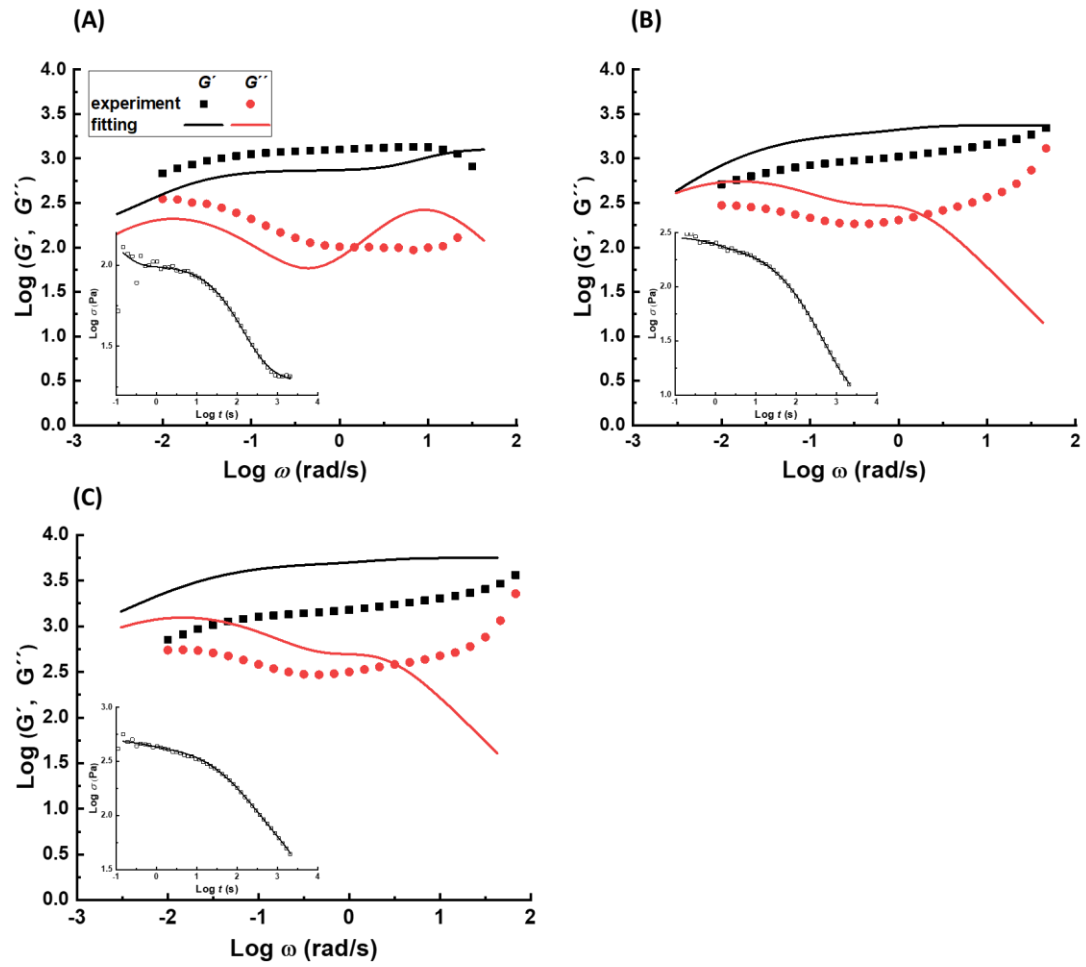

Figure S 8. Experimental and calculated frequency sweep data for samples (A)103, (B)153, and (C)203 at 20 °C. Insets represent the experimental and calculated stress relaxation for the corresponding samples.

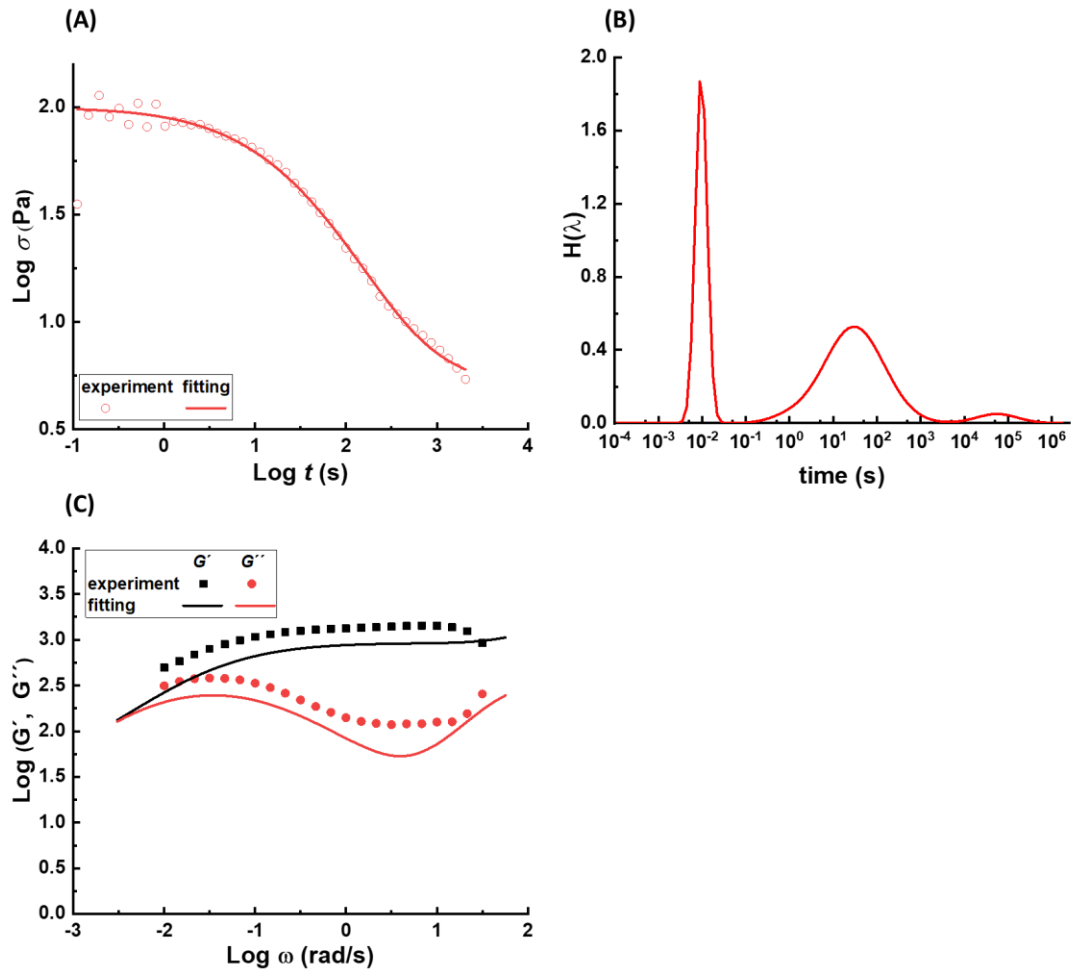

Figure S 9. (A) experimental and fitted stress relaxation data, (B) relaxation time spectrum, and (C) experimental and fitted frequency sweep data of sample pAA10\_NC3 at 30 °C. The fitted data and the relaxation time spectrum are obtained by considering 4 relaxation modes. The relaxation time, PDI, and weight of this additional relaxation mode are 0.01 s, 1.1, and 0.17%, respectively. The results show a better agreement between experimental and fitted frequency sweep data. In addition, the overlap of the first two relaxation peaks in the relaxation time spectrum, are not observed anymore.

Table S 1. The fit parameters obtained from the fitting of stress relaxation data by considering three relaxation modes

| Sample        | Temperature (°C) | $\tau_1$ (s)   | $\tau_2$ (s)   | $\tau_3$ (s)   | $PDI_1$        | $PDI_2$        | $PDI_3$        | $W_1$        | $W_2$        | $W_3$        |
|---------------|------------------|----------------|----------------|----------------|----------------|----------------|----------------|--------------|--------------|--------------|
| pAA10_<br>NC3 | 20               | 0.11540<br>335 | 135.908<br>963 | 98058.3<br>934 | 1.12910<br>878 | 3.24042<br>403 | 0.11540<br>335 | 0.200<br>828 | 0.652<br>633 | 0.146<br>539 |
| pAA15_<br>NC3 | 20               | 0.95084<br>939 | 238.298<br>881 | 99981.2<br>396 | 1.12887<br>548 | 12.9346<br>649 | 0.95084<br>939 | 0.047<br>073 | 0.944<br>791 | 0.008<br>136 |
| pAA20_<br>NC3 | 20               | 0.56614<br>133 | 260.647<br>505 | 7285.95<br>638 | 1.13376<br>895 | 14.9579<br>503 | 0.56614<br>133 | 0.034<br>34  | 0.918<br>718 | 0.046<br>942 |
| pAA20_<br>NC2 | 20               | 0.04419<br>676 | 157.339<br>386 | 99927.0<br>757 | 4.49637<br>966 | 8.19549<br>413 | 0.04419<br>676 | 0.068<br>011 | 0.921<br>135 | 0.010<br>853 |
| pAA20_<br>NC4 | 20               | 2.59499<br>925 | 402.229<br>326 | 97962.0<br>004 | 14.0694<br>403 | 11.7006<br>265 | 2.59499<br>925 | 0.523<br>271 | 0.425<br>209 | 0.051<br>52  |
| pAA10_<br>NC3 | 30               | 1.51128<br>225 | 105.076<br>205 | 98993.8<br>364 | 2.76340<br>974 | 12.2678<br>436 | 3.17468<br>9   | 0.020<br>335 | 0.938<br>479 | 0.041<br>186 |
| pAA15_<br>NC3 | 30               | 0.86975<br>655 | 62.2622<br>439 | 99973.6<br>08  | 1.10795<br>724 | 6.29986<br>096 | 1.22747<br>2   | 0.032<br>761 | 0.949<br>597 | 0.017<br>642 |
| pAA20_<br>NC3 | 30               | 0.46327<br>881 | 133.736<br>008 | 98847.1<br>463 | 1.10076<br>295 | 14.9996<br>929 | 1.19056        | 0.041<br>849 | 0.944<br>096 | 0.014<br>055 |
| pAA20_<br>NC2 | 30               | 1.70488<br>554 | 68.7749<br>853 | 99999.9<br>57  | 4.41635<br>968 | 14.9999<br>624 | 1.21907<br>1   | 0.000<br>167 | 0.996<br>49  | 0.003<br>343 |
| pAA20_<br>NC4 | 30               | 4.95779<br>499 | 253.865<br>403 | 90209.8<br>432 | 4.92751<br>198 | 12.2286<br>889 | 4.46290<br>1   | 0.440<br>849 | 0.511<br>226 | 0.047<br>926 |
